# Supplementary material
Source: publisher figshare collection journal article supplement (https://acs.figshare.com/ndownloader/files/9599557)
Supplement: Supplementary file 1 [file 9599557]

Supporting Information

**Synthesis of  $\text{Ag}_3\text{PO}_4$  Crystals with Tunable Shapes for Facet-Dependent Optical Property, Photocatalytic Activity and Electrical Conductivity Examinations**

Meng-Shan Hsieh,<sup>†</sup> Huang-Jen Su,<sup>‡</sup> Pei-Lun Hsieh,<sup>§</sup> Yun-Wei Chiang,<sup>†</sup> and Michael H. Huang<sup>\*,†</sup>

<sup>†</sup>Department of Chemistry, <sup>‡</sup>Interdisciplinary Program of Sciences, and <sup>§</sup>Department of Materials Science and Engineering, National Tsing Hua University, Hsinchu 30013, Taiwan

E-mail: hyhuang@mx.nthu.edu.tw

## Experimental Section

**Electron Paramagnetic Resonance Analysis.** To detect hydroxyl radicals generated from a photocatalyst, DMPO (5,5-dimethyl-1-pyrroline N-oxide) is commonly introduced as a spin trapping agent. A 0.1 M DMPO solution was prepared by adding 67.9 mg of DMPO to 6 mL of deionized water. The 6 mL of 0.1 M DMPO solution was carefully injected through 2 mL of activated carbon solution in a syringe fitted with a 0.45  $\mu\text{m}$  filter at the syringe tip. The injection was repeated two more times to ensure clean EPR spectra can be obtained. The synthesized  $\text{Ag}_3\text{PO}_4$  cubes (732 nm), rhombic dodecahedra (362 nm), and tetrahedra (600 nm) with particle surface area ratios of 1 : 2.02 : 2.99 initially stored in ethanol were dried and weighted. 10.9, 5.4, and 3.6 mg of  $\text{Ag}_3\text{PO}_4$  cubes, rhombic dodecahedra, and tetrahedra having the same total particle surface area (0.0882  $\text{m}^2$ ) were dispersed in 1 mL of deionized water with sonication, then 1 mL of 0.1 M DMPO was added into the solution. The solution was irradiated by a 500-W Xenon lamp with stirring for 5 min and sent for EPR analysis immediately. The EPR signals of radicals spin-trapped by DMPO were all recorded at ambient temperature. The settings of EPR instrument were: microwave frequency 9.80 GHz, microwave power 15.0 mW, sweep width 100 G, modulation frequency 100 kHz, and modulation amplitude 1 G.

**Electrical Conductivity Measurements.** For electrical conductivity measurements on single  $\text{Ag}_3\text{PO}_4$  crystals, tungsten probes were prepared from tungsten wires (99.95%, Alfa Aesar). A direct current (15 V and 1.5 A) was applied to sharpen the wire tips by electrolysis in a 2.0 M NaOH solution. After finishing electrolysis in 1 min, the tungsten wire tips have reduced to  $\sim 300$  nm. To remove the tungsten oxide layer on the wire surface, the probe tips were immersed into a 10 M KOH solution for 5 s. Separately, a Si (111) substrate was annealed at 900  $^\circ\text{C}$  in air atmosphere in a tube furnace for 48 h to form a  $\text{SiO}_2$  layer thicker than 500 nm on the substrate as an insulating layer to prevent leakage current flowing from the  $\text{Ag}_3\text{PO}_4$  crystal to the Si substrate. Next, a dilute solution of  $\text{Ag}_3\text{PO}_4$  crystals was dropped on the thermally treated Si substrate. After evaporating the droplet, the Si substrate with  $\text{Ag}_3\text{PO}_4$  particles was loaded inside a JEOL 7000F scanning electron microscope. The treated tungsten probes were installed on a nanomanipulator (Kammrath & Wiess GmbH), which was connected to a Keithley Model 4200-SCS source measurement unit. The nanomanipulator was loaded inside the same electron microscope. The two tungsten probes were first brought in contact with an electric current applied until a linear  $I$ – $V$  curve was obtained. This  $I$ – $V$  curve signifies purely metallic contact has been formed and any surface oxide was removed.

At room temp.

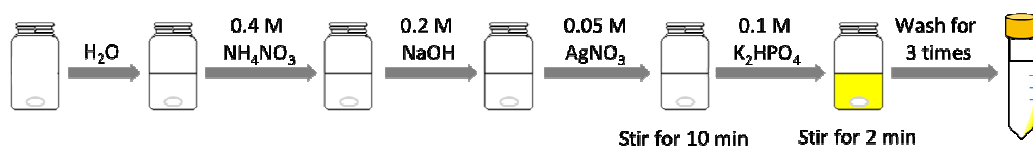

**Scheme S1.** Illustration of the general procedure used to make  $\text{Ag}_3\text{PO}_4$  crystals with tunable shapes.

**Table S1.** Exact reagent amounts used in the growth of  $\text{Ag}_3\text{PO}_4$  crystals with tunable shapes.

| Shape                               | $\text{H}_2\text{O}$ | 0.4 M $\text{NH}_4\text{NO}_3$ | 0.2 M $\text{NaOH}$ | 0.05 M $\text{AgNO}_3$ | 0.1 M $\text{K}_2\text{HPO}_4$ | Total volume |
|-------------------------------------|----------------------|--------------------------------|---------------------|------------------------|--------------------------------|--------------|
| Cubes                               | 8920.0 $\mu\text{L}$ | 100 $\mu\text{L}$              | 180 $\mu\text{L}$   | 400 $\mu\text{L}$      | 400 $\mu\text{L}$              | 10 mL        |
| Rhombic Dodecahedra                 | 8420.0 $\mu\text{L}$ | 600 $\mu\text{L}$              | 180 $\mu\text{L}$   | 400 $\mu\text{L}$      | 400 $\mu\text{L}$              | 10 mL        |
| {100}-Truncated Rhombic Dodecahedra | 8120.0 $\mu\text{L}$ | 600 $\mu\text{L}$              | 180 $\mu\text{L}$   | 550 $\mu\text{L}$      | 550 $\mu\text{L}$              | 10 mL        |
| Tetrahedra                          | 1887.4 $\mu\text{L}$ | 218.8 $\mu\text{L}$            | 393.8 $\mu\text{L}$ | 500 $\mu\text{L}$      | 0.7 M<br>7000 $\mu\text{L}$    | 10 mL        |
| Tetrapods                           | 1887.4 $\mu\text{L}$ | 281.3 $\mu\text{L}$            | 506.3 $\mu\text{L}$ | 500 $\mu\text{L}$      | 0.7 M<br>7000 $\mu\text{L}$    | 10 mL        |

At room temp.

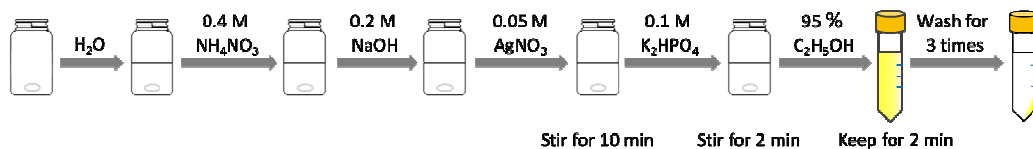

**Scheme S2.** Illustration of the procedure used to make smaller  $\text{Ag}_3\text{PO}_4$  rhombic dodecahedra and tetrahedra.

**Table S2.** Exact reagent amounts used in the growth of smaller  $\text{Ag}_3\text{PO}_4$  rhombic dodecahedra and tetrahedra.

| Shape               | $\text{H}_2\text{O}$ | 0.4 M $\text{NH}_4\text{NO}_3$ | 0.2 M $\text{NaOH}$ | 0.05 M $\text{AgNO}_3$ | 0.1 M $\text{K}_2\text{HPO}_4$ | Total volume | 95 % $\text{C}_2\text{H}_5\text{OH}$ |
|---------------------|----------------------|--------------------------------|---------------------|------------------------|--------------------------------|--------------|--------------------------------------|
| Rhombic Dodecahedra | 8495 $\mu\text{L}$   | 600 $\mu\text{L}$              | 180 $\mu\text{L}$   | 325 $\mu\text{L}$      | 400 $\mu\text{L}$              | 10 mL        | 7.5 mL                               |
| Tetrahedra          | 2062.4 $\mu\text{L}$ | 218.8 $\mu\text{L}$            | 393.8 $\mu\text{L}$ | 325 $\mu\text{L}$      | 0.7 M<br>7000 $\mu\text{L}$    | 10 mL        | 7.5 mL                               |

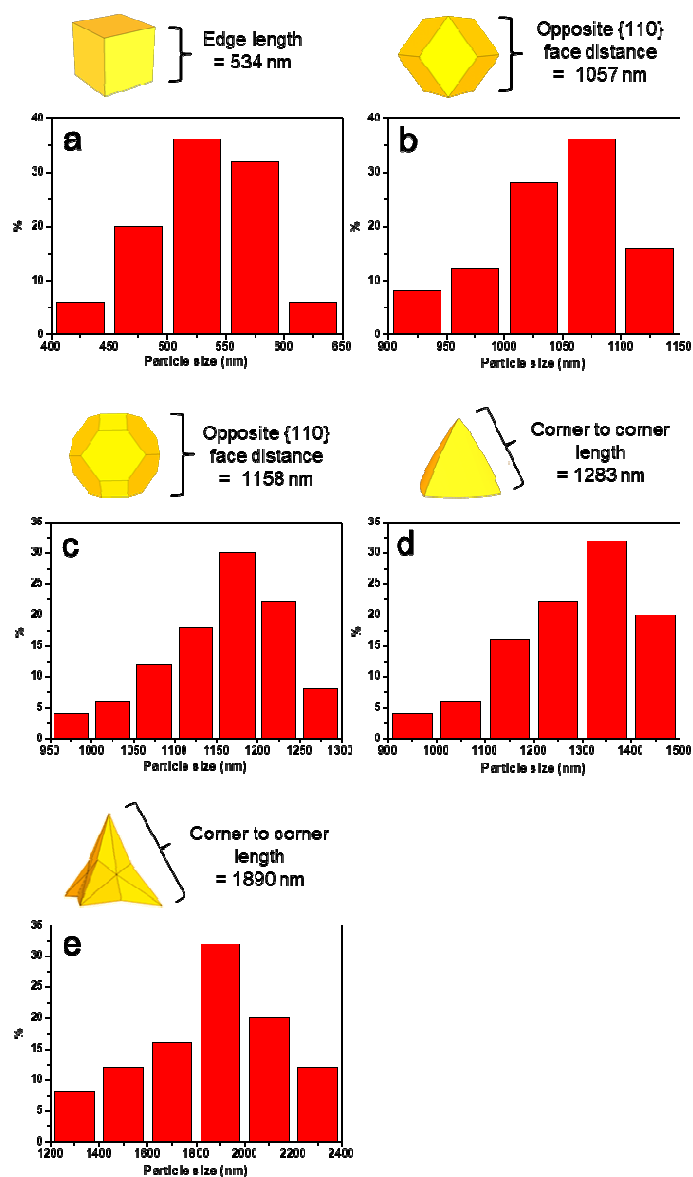

**Figure S1.** Size distribution histograms of  $\text{Ag}_3\text{PO}_4$  (a) cubes, (b) rhombic dodecahedra, (c) {100}-truncated rhombic dodecahedra, (d) tetrahedra, and (e) tetrapods. The measured lengths are indicated.



**Table S3.** Average  $\text{Ag}_3\text{PO}_4$  crystal sizes and their standard deviations.

| Shapes                              | Average particle size (nm) | Standard deviation (%) |
|-------------------------------------|----------------------------|------------------------|
| Cubes                               | $534 \pm 47$               | 9                      |
| Rhombic Dodecahedra                 | $1057 \pm 60$              | 6                      |
| {100}-Truncated Rhombic Dodecahedra | $1158 \pm 77$              | 7                      |
| Tetrahedra                          | $1283 \pm 121$             | 9                      |
| Tetrapods                           | $1890 \pm 269$             | 14                     |

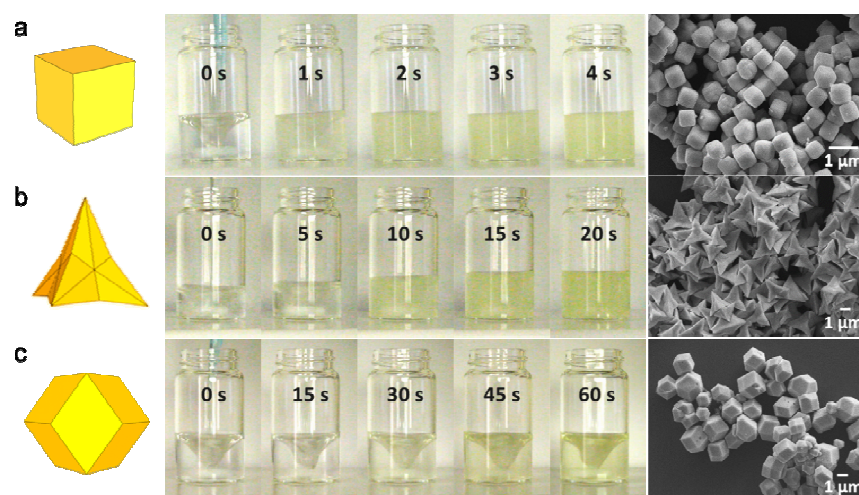

**Figure S2.** Photographs and SEM images showing different growth rates in the formation of  $\text{Ag}_3\text{PO}_4$  (a) cubes, (b) tetrapods, and (c) rhombic dodecahedra through observation of their solution color changes as a function of reaction time.

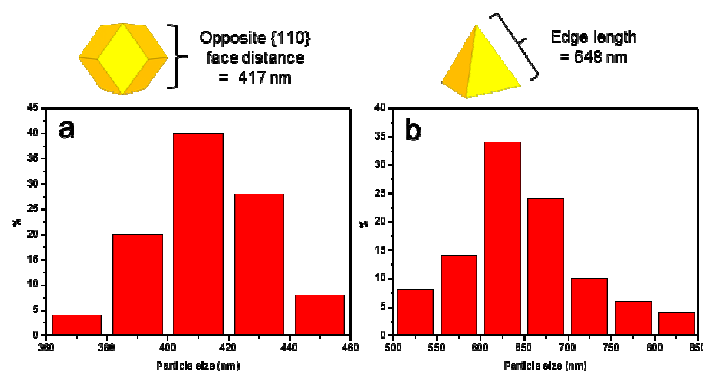

**Figure S3.** Size distribution histograms of smaller  $\text{Ag}_3\text{PO}_4$  (a) rhombic dodecahedra and (b) tetrahedra. The measured lengths are indicated.

**Table S4.** Average sizes of the smaller Ag<sub>3</sub>PO<sub>4</sub> rhombic dodecahedra and tetrahedra.

| Shape               | Average particle size (nm) | Standard deviation (%) |
|---------------------|----------------------------|------------------------|
| Rhombic Dodecahedra | 417 ± 18                   | 4                      |
| Tetrahedra          | 648 ± 76                   | 12                     |

**Table S5.** Reaction conditions and procedures used to make Ag<sub>3</sub>PO<sub>4</sub> cubes and rhombic dodecahedra with tunable sizes. Ethanol was used only for preparing 298 nm rhombic dodecahedra. Due to the fast reaction, consistent control of particle sizes was not always achieved despite following the same reaction conditions.

| Cubes  | H <sub>2</sub> O | 0.4 M NH <sub>4</sub> NO <sub>3</sub> | 0.2 M NaOH | 0.05 M AgNO <sub>3</sub> | 0.1 M K <sub>2</sub> HPO <sub>4</sub> | Total volume |
|--------|------------------|---------------------------------------|------------|--------------------------|---------------------------------------|--------------|
| 365 nm | 8380 µL          | 150 µL                                | 270 µL     | 600 µL                   | 600 µL                                | 10 mL        |
| 462 nm | 8920 µL          | 100 µL                                | 180 µL     | 400 µL                   | 400 µL                                | 10 mL        |
| 530 nm | 8920 µL          | 100 µL                                | 180 µL     | 400 µL                   | 400 µL                                | 10 mL        |
| 648 nm | 8920 µL          | 100 µL                                | 180 µL     | 400 µL                   | 400 µL                                | 10 mL        |

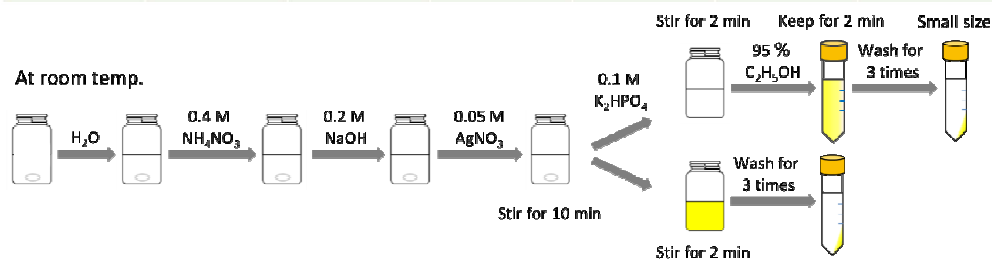

| RD      | H <sub>2</sub> O | 0.4 M NH <sub>4</sub> NO <sub>3</sub> | 0.2 M NaOH | 0.05 M AgNO <sub>3</sub> | 0.1 M K <sub>2</sub> HPO <sub>4</sub> | Total volume | 95 % C <sub>2</sub> H <sub>5</sub> OH |
|---------|------------------|---------------------------------------|------------|--------------------------|---------------------------------------|--------------|---------------------------------------|
| 289 nm  | 8495 µL          | 600 µL                                | 180 µL     | 325 µL                   | 600 µL                                | 10 mL        | 7.5 mL                                |
| 643 nm  | 8420 µL          | 600 µL                                | 180 µL     | 400 µL                   | 400 µL                                | 10 mL        | X                                     |
| 993 nm  | 8420 µL          | 600 µL                                | 180 µL     | 400 µL                   | 400 µL                                | 10 mL        | X                                     |
| 1314 nm | 8420 µL          | 600 µL                                | 180 µL     | 400 µL                   | 400 µL                                | 10 mL        | X                                     |

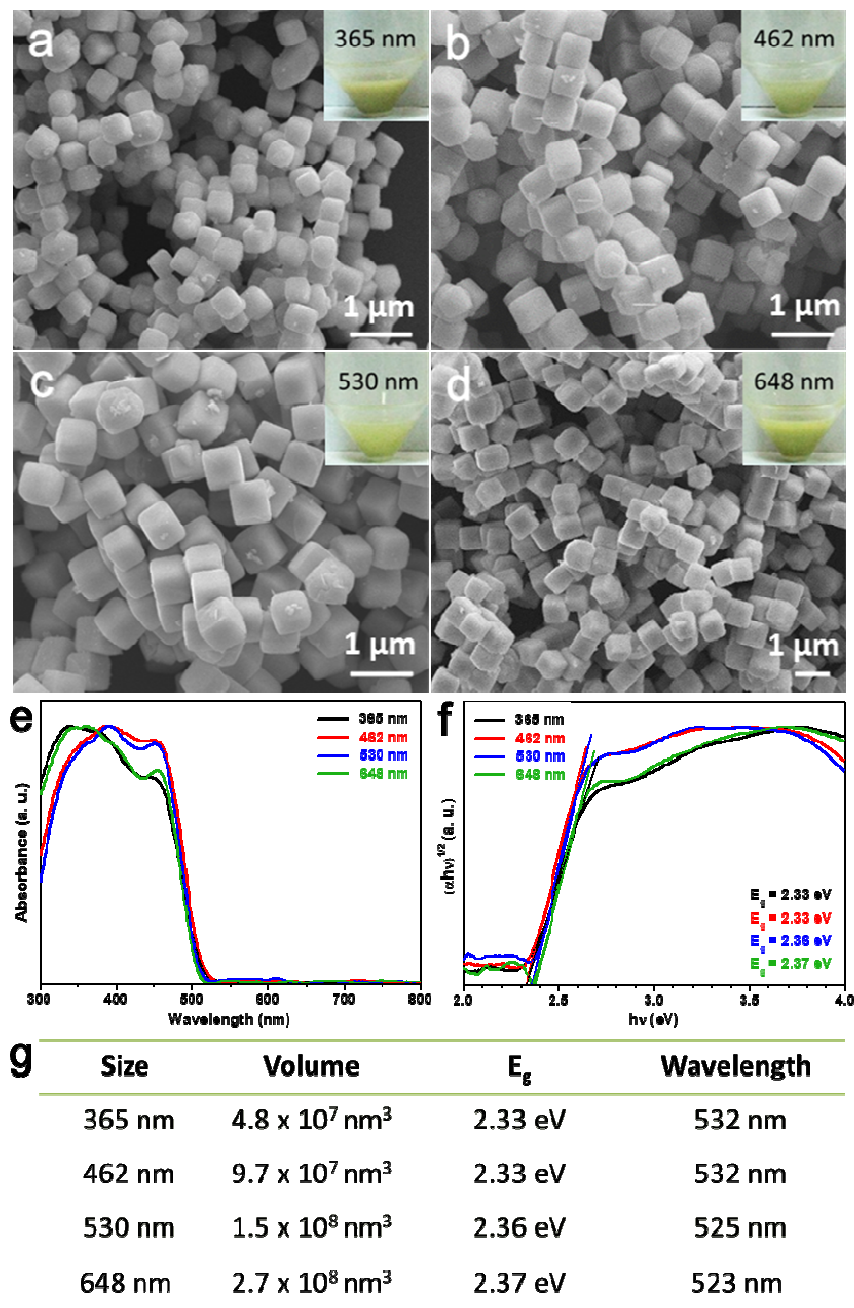

**Figure S4.** (a–d) SEM images of  $\text{Ag}_3\text{PO}_4$  cubes with edge lengths of (a) 365, (b) 462, (c) 530, and (d) 648 nm. Insets show their solution colors. (e) Diffuse reflectance spectra of these  $\text{Ag}_3\text{PO}_4$  cubes. (f) Tauc plot of these  $\text{Ag}_3\text{PO}_4$  cubes to determine their indirect optical band gaps. (g) Volumes of these cubes and their band gaps and the corresponding light wavelengths.

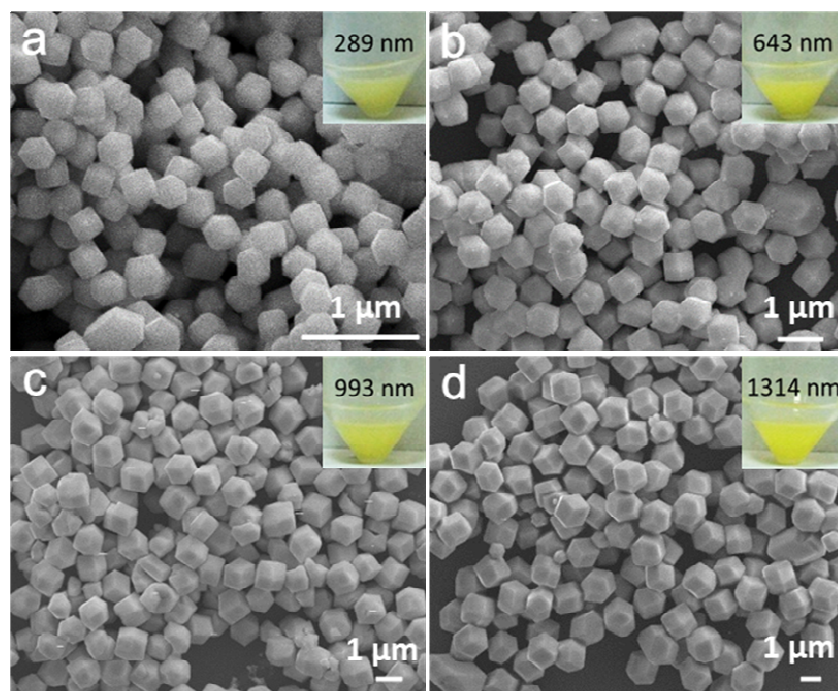

| e | Size    | Volume                         | $E_g$   | Wavelength |
|---|---------|--------------------------------|---------|------------|
|   | 289 nm  | $1.7 \times 10^7 \text{ nm}^3$ | 2.25 eV | 551 nm     |
|   | 643 nm  | $1.9 \times 10^8 \text{ nm}^3$ | 2.34 eV | 530 nm     |
|   | 993 nm  | $6.9 \times 10^8 \text{ nm}^3$ | 2.34 eV | 530 nm     |
|   | 1314 nm | $1.6 \times 10^9 \text{ nm}^3$ | 2.35 eV | 528 nm     |

**Figure S5.** (a–d) SEM images of  $\text{Ag}_3\text{PO}_4$  rhombic dodecahedra with opposite face distances of (a) 289, (b) 643, (c) 993, and (d) 1314 nm. Insets show their solution colors. (e) Volumes of these rhombic dodecahedra and their band gaps and the corresponding light wavelengths.

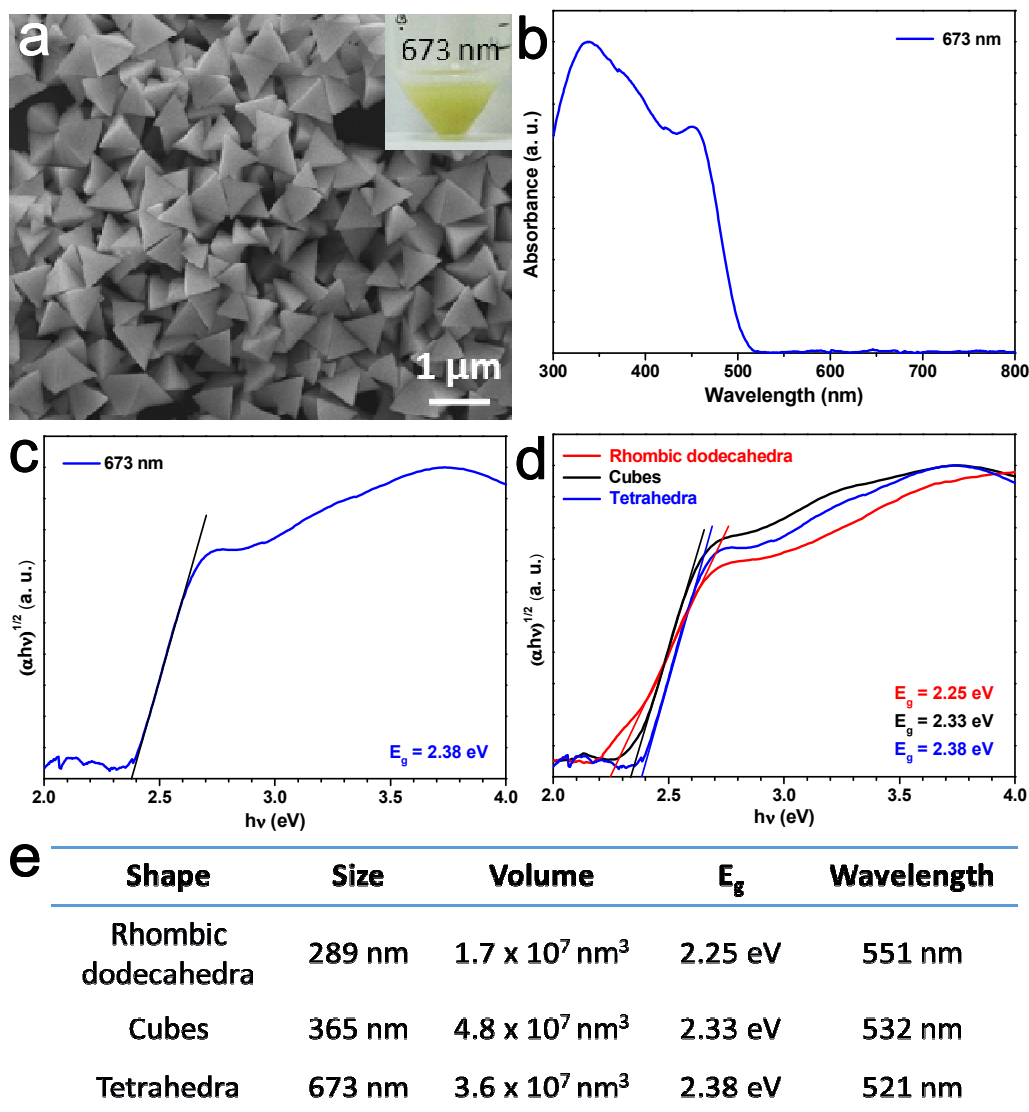

**Figure S6.** (a) SEM images of  $\text{Ag}_3\text{PO}_4$  tetrahedra with an average edge length of 673 nm. Insets show the solution color. (b) Diffuse reflectance spectra of the  $\text{Ag}_3\text{PO}_4$  tetrahedra. (c) Tauc plot of the  $\text{Ag}_3\text{PO}_4$  tetrahedra to determine their indirect optical band gaps. (d) Tauc plots for  $\text{Ag}_3\text{PO}_4$  rhombic dodecahedra, cubes, and tetrahedra having similar particle sizes for comparison of their band gap values. (e) Volumes of the particles shown in panel d and their band gaps and the corresponding light wavelengths.

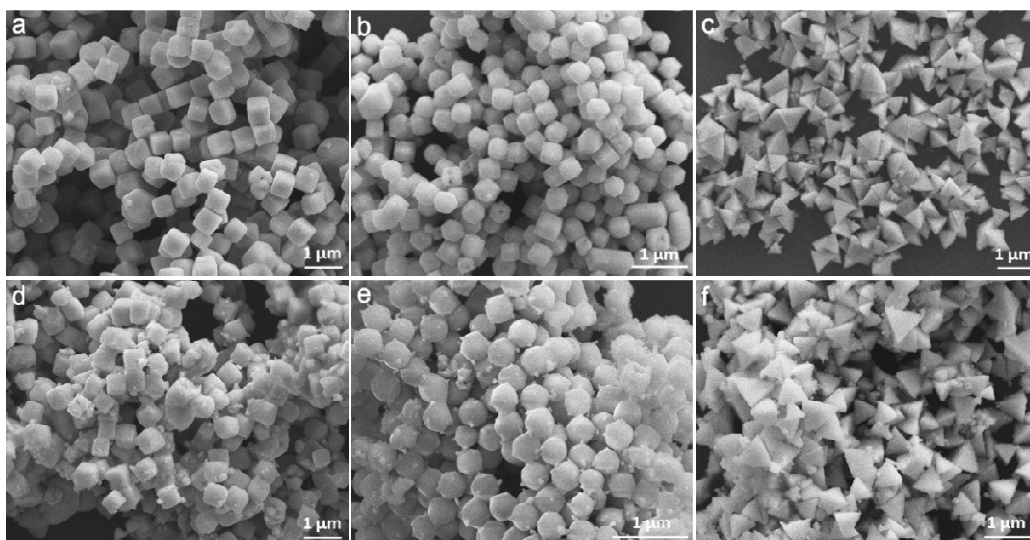

**Figure S7.** SEM images of  $\text{Ag}_3\text{PO}_4$  (a, d) cubes, (b, e) rhombic dodecahedra, and (c, f) tetrahedra before (a–c) and after (d–f) 90 min of the photoirradiation experiment.

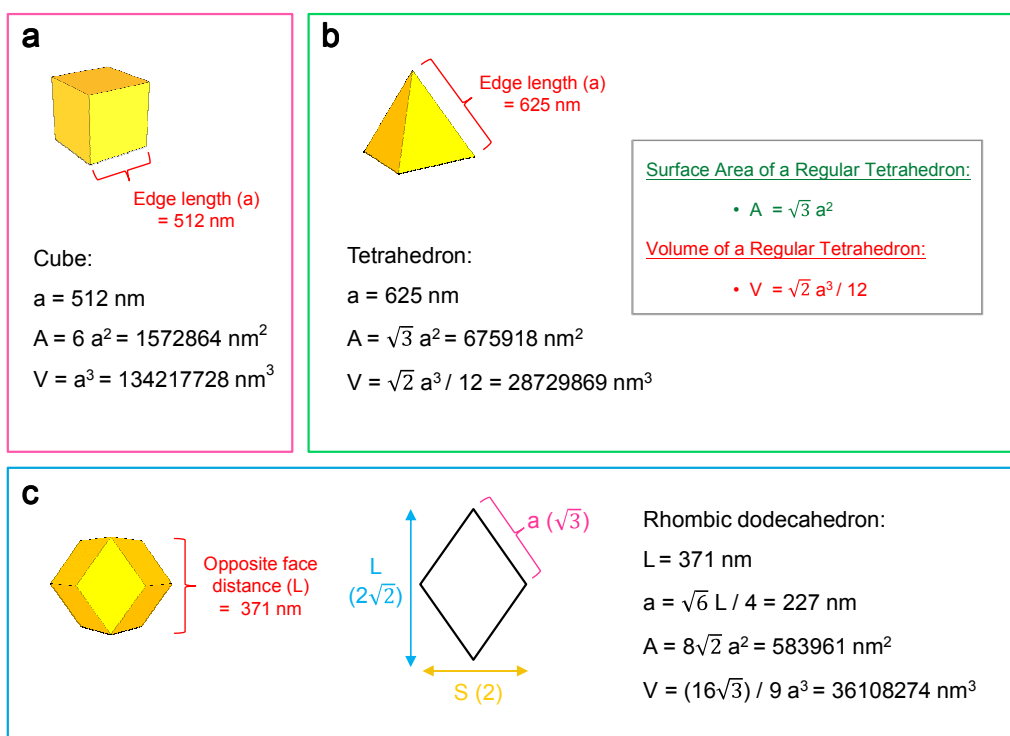

**Figure S8.** Calculations of the surface area and volume of a single  $\text{Ag}_3\text{PO}_4$  (a) cube, (b) tetrahedron, and (c) rhombic dodecahedron.



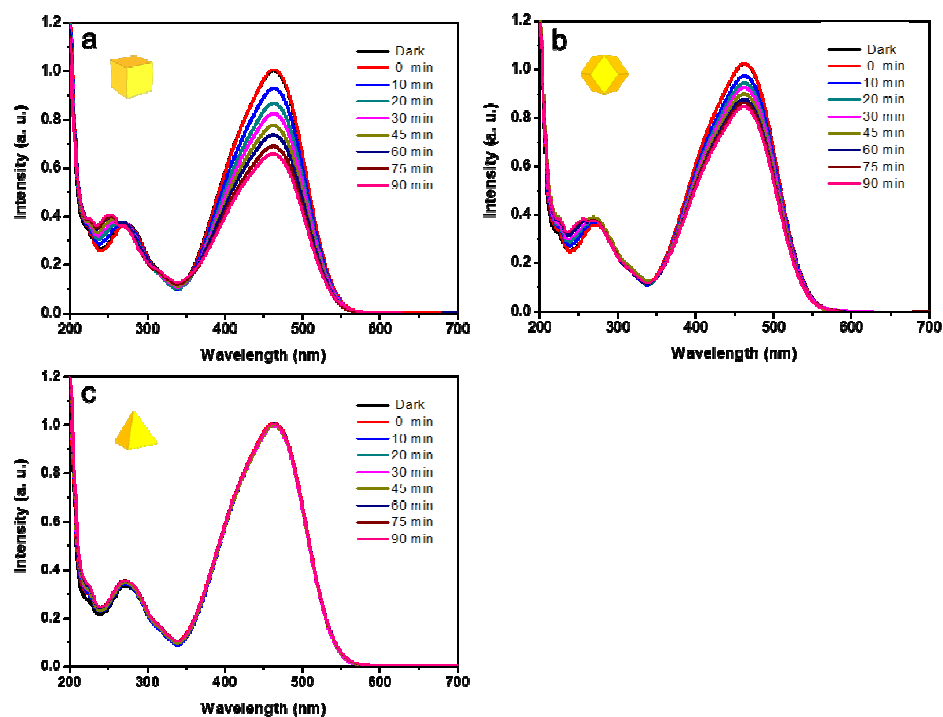

**Figure S9.** UV-vis absorption spectra of methyl orange as a function of irradiation time using Ag<sub>3</sub>PO<sub>4</sub> (a) cubes, (b) rhombic dodecahedra, and (c) tetrahedra as the photocatalysts.

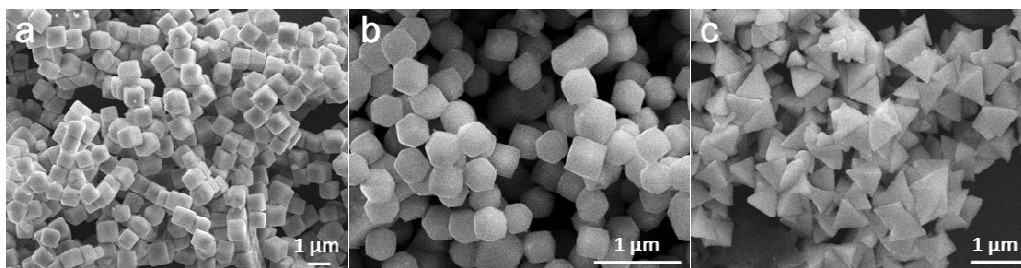

**Figure S10.** SEM images of Ag<sub>3</sub>PO<sub>4</sub> (a) cubes, (b) rhombic dodecahedra, and (c) tetrahedra used for EPR measurements.

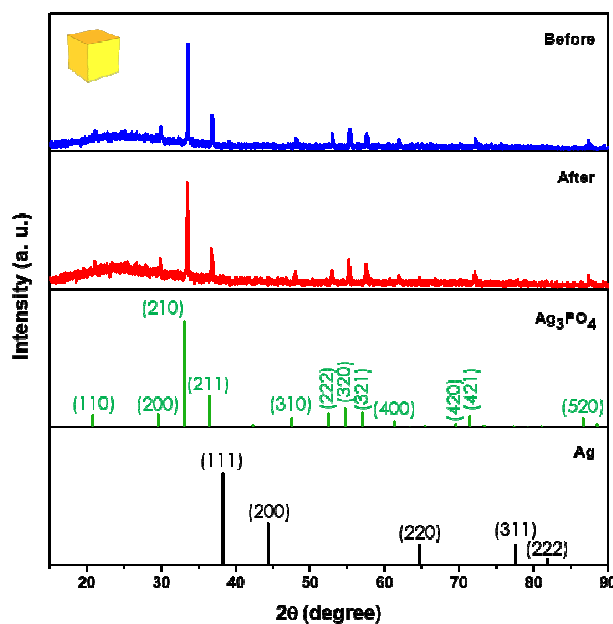

**Figure S11.** XRD patterns of  $\text{Ag}_3\text{PO}_4$  cubes before and after the photocatalysis experiment. The standard patterns of  $\text{Ag}_3\text{PO}_4$  and Ag are shown.

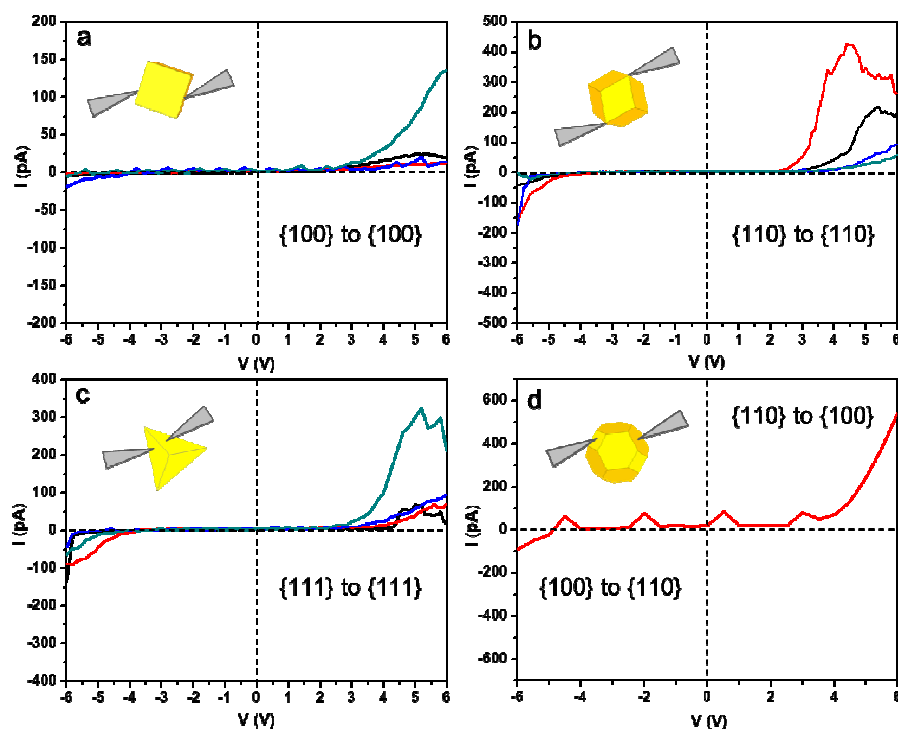

**Figure S12.** (a–c) Multiple  $I$ – $V$  curves measured on a single  $\text{Ag}_3\text{PO}_4$  (a) cube, (b) rhombic dodecahedron, and (c) tetrahedron. (d) One  $I$ – $V$  curve obtained with W probes contacting the {110} and {100} faces of a  $\text{Ag}_3\text{PO}_4$  {100}-truncated rhombic dodecahedron.
